# Supplementary material for: Feasibility of a drop-in γ-probe for radioguided sentinel lymph detection in early-stage cervical cancer
Source: PubMed Central journal article supplement (PMC9209631; doi:10.1186/s13550-022-00907-w), 2022-06-20
Supplement: 13550_2022_907_MOESM1_ESM.pdf [file 13550_2022_907_MOESM1_ESM.pdf]

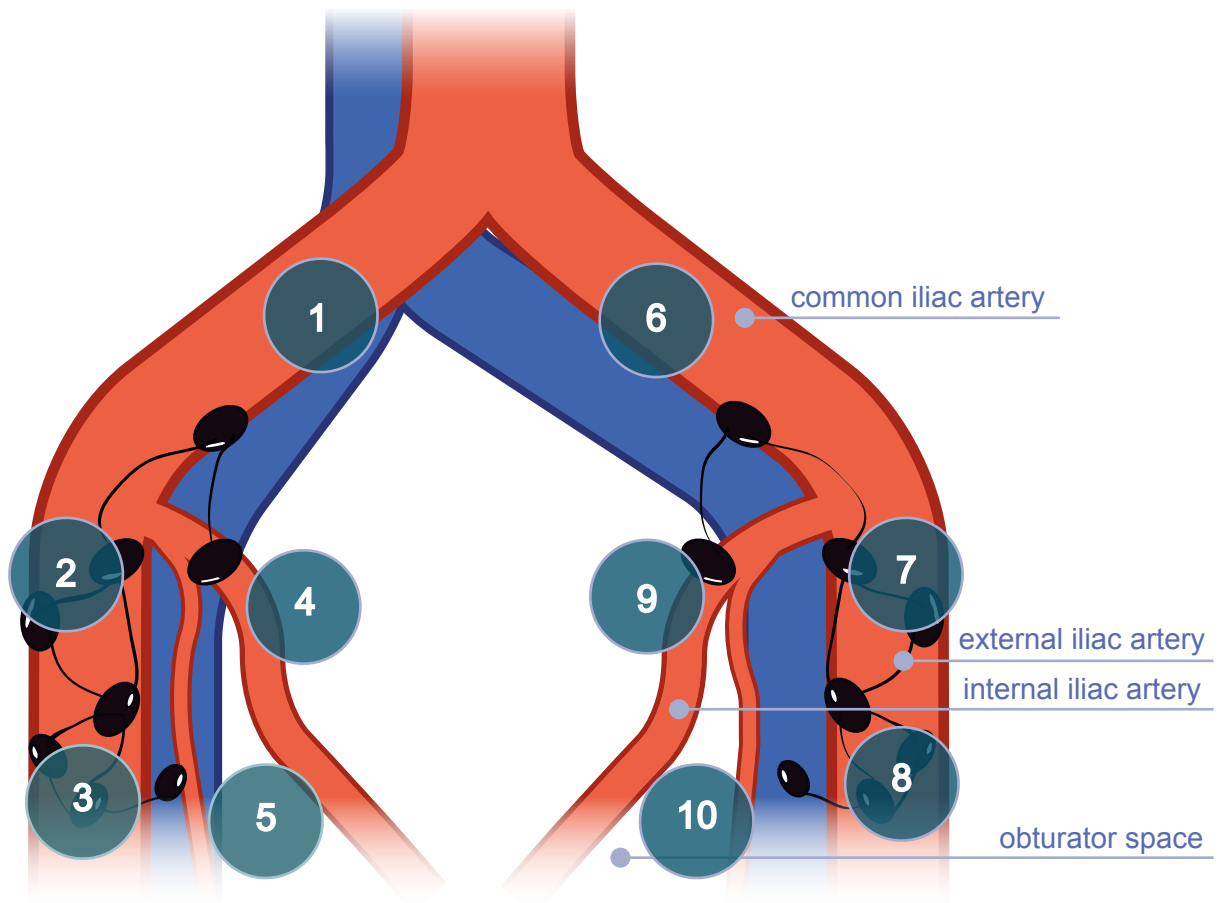

All other locations: out of template

- |                                |                               |
|--------------------------------|-------------------------------|
| 1. Common iliac artery right   | 6. Common iliac artery left   |
| 2. External iliac artery right | 7. External iliac artery left |
| 3. Rosenmuller's node right    | 8. Rosenmuller's node left    |
| 4. Internal iliac artery right | 9. Internal iliac artery left |
| 5. Obturator space right       | 10. Obturator space left      |
