# Supplementary material for: Feasibility of a drop-in γ-probe for radioguided sentinel lymph detection in early-stage cervical cancer
Source: Springer Nature journal article supplement (doi:10.1186/s13550-022-00907-w), 2022-06-20
Supplement: MOESM2 [file 23183830]

Study ID -

Date of Assessment / /   
(dd / mmm / yyyy)

**EASE OF USE  
SURGEON 1/5**

**SURGERY  
(Day 1)**

**Clinical performance**

|                                                                                                                                                                                          | Strongly                 |                          | Neither                  |                          | Strongly                 | Do not                   |
|------------------------------------------------------------------------------------------------------------------------------------------------------------------------------------------|--------------------------|--------------------------|--------------------------|--------------------------|--------------------------|--------------------------|
|                                                                                                                                                                                          | Disagree                 | Disagree                 | Disagree                 | Agree                    | Agree                    | Know                     |
| 1. I am happy to use the SENSEI <sup>®</sup> system intraoperatively to locate sentinel lymph nodes for excision                                                                         | <input type="checkbox"/> | <input type="checkbox"/> | <input type="checkbox"/> | <input type="checkbox"/> | <input type="checkbox"/> | <input type="checkbox"/> |
| 2. In my opinion the administered activity is sufficient to successfully detect sentinel lymph nodes with SENSEI <sup>®</sup>                                                            | <input type="checkbox"/> | <input type="checkbox"/> | <input type="checkbox"/> | <input type="checkbox"/> | <input type="checkbox"/> | <input type="checkbox"/> |
| 3. In my opinion the time between injection and surgery is sufficient to successfully detect sentinel lymph nodes with SENSEI <sup>®</sup>                                               | <input type="checkbox"/> | <input type="checkbox"/> | <input type="checkbox"/> | <input type="checkbox"/> | <input type="checkbox"/> | <input type="checkbox"/> |
| 4. The signal from background sources does not impede detection of the sentinel lymph node                                                                                               | <input type="checkbox"/> | <input type="checkbox"/> | <input type="checkbox"/> | <input type="checkbox"/> | <input type="checkbox"/> | <input type="checkbox"/> |
| 5. The field of view of SENSEI <sup>®</sup> is adequate for detecting sentinel lymph nodes                                                                                               | <input type="checkbox"/> | <input type="checkbox"/> | <input type="checkbox"/> | <input type="checkbox"/> | <input type="checkbox"/> | <input type="checkbox"/> |
| 6. SENSEI <sup>®</sup> is useful when measuring the residual radioactivity of the surgical site                                                                                          | <input type="checkbox"/> | <input type="checkbox"/> | <input type="checkbox"/> | <input type="checkbox"/> | <input type="checkbox"/> | <input type="checkbox"/> |
| 7. The SENSEI <sup>®</sup> system has value when used in cervical cancer surgery                                                                                                         | <input type="checkbox"/> | <input type="checkbox"/> | <input type="checkbox"/> | <input type="checkbox"/> | <input type="checkbox"/> | <input type="checkbox"/> |
| 8. Based on my experience, I think that the SENSEI <sup>®</sup> system has the potential to replace other tools used to locate sentinel lymph nodes for excision e.g. rigid gamma probes | <input type="checkbox"/> | <input type="checkbox"/> | <input type="checkbox"/> | <input type="checkbox"/> | <input type="checkbox"/> | <input type="checkbox"/> |
| 9. Pre-operative imaging is a critical element of using the SENSEI <sup>®</sup> system                                                                                                   | <input type="checkbox"/> | <input type="checkbox"/> | <input type="checkbox"/> | <input type="checkbox"/> | <input type="checkbox"/> | <input type="checkbox"/> |
| 10. Based on my experience I think that the SENSEI <sup>®</sup> system has the potential to be used without pre-operative imaging to locate sentinel lymph nodes for excision            | <input type="checkbox"/> | <input type="checkbox"/> | <input type="checkbox"/> | <input type="checkbox"/> | <input type="checkbox"/> | <input type="checkbox"/> |

Subject ID -
**EASE OF USE  
SURGEON 2/5**
**SURGERY**  
(Day 1)

| Usability function                                                                                                                                              | Strongly Disagree        |                          | Neither Agree or Disagree |                          | Strongly Agree           | Do not Know              |
|-----------------------------------------------------------------------------------------------------------------------------------------------------------------|--------------------------|--------------------------|---------------------------|--------------------------|--------------------------|--------------------------|
|                                                                                                                                                                 | Disagree                 | Disagree                 | Disagree                  | Agree                    | Agree                    | Know                     |
| 11. I found the SENSEI <sup>®</sup> system easy to use                                                                                                          | <input type="checkbox"/> | <input type="checkbox"/> | <input type="checkbox"/>  | <input type="checkbox"/> | <input type="checkbox"/> | <input type="checkbox"/> |
| 12. Turning the SENSEI <sup>®</sup> system on/off is easy                                                                                                       | <input type="checkbox"/> | <input type="checkbox"/> | <input type="checkbox"/>  | <input type="checkbox"/> | <input type="checkbox"/> | <input type="checkbox"/> |
| 13. Conducting the probe check is easy to do                                                                                                                    | <input type="checkbox"/> | <input type="checkbox"/> | <input type="checkbox"/>  | <input type="checkbox"/> | <input type="checkbox"/> | <input type="checkbox"/> |
| 14. Conducting the probe check at the beginning of surgery has not disrupted my or my teams clinical practice                                                   | <input type="checkbox"/> | <input type="checkbox"/> | <input type="checkbox"/>  | <input type="checkbox"/> | <input type="checkbox"/> | <input type="checkbox"/> |
| 15. I am happy handling the radioactive source during the probe check                                                                                           | <input type="checkbox"/> | <input type="checkbox"/> | <input type="checkbox"/>  | <input type="checkbox"/> | <input type="checkbox"/> | <input type="checkbox"/> |
| 16. It is easy to maintain the probes sterility during the probe check                                                                                          | <input type="checkbox"/> | <input type="checkbox"/> | <input type="checkbox"/>  | <input type="checkbox"/> | <input type="checkbox"/> | <input type="checkbox"/> |
| 17. The time taken to complete the probe check is acceptable                                                                                                    | <input type="checkbox"/> | <input type="checkbox"/> | <input type="checkbox"/>  | <input type="checkbox"/> | <input type="checkbox"/> | <input type="checkbox"/> |
| 18. I know where to find the probe check code and how to enter it in the Control Unit                                                                           | <input type="checkbox"/> | <input type="checkbox"/> | <input type="checkbox"/>  | <input type="checkbox"/> | <input type="checkbox"/> | <input type="checkbox"/> |
| 19. Inserting/introducing the SENSEI <sup>®</sup> Tethered Probe into the patient is easy                                                                       | <input type="checkbox"/> | <input type="checkbox"/> | <input type="checkbox"/>  | <input type="checkbox"/> | <input type="checkbox"/> | <input type="checkbox"/> |
| 20. The stiffness of the cable is adequate for successful manipulation of the Tethered Probe                                                                    | <input type="checkbox"/> | <input type="checkbox"/> | <input type="checkbox"/>  | <input type="checkbox"/> | <input type="checkbox"/> | <input type="checkbox"/> |
| 21. The cable does not obscure the field of view during manipulation of the Tethered Probe                                                                      | <input type="checkbox"/> | <input type="checkbox"/> | <input type="checkbox"/>  | <input type="checkbox"/> | <input type="checkbox"/> | <input type="checkbox"/> |
| 22. I find it easy to interpret the audio signals from the SENSEI <sup>®</sup> Control Unit to localise a sentinel lymph node                                   | <input type="checkbox"/> | <input type="checkbox"/> | <input type="checkbox"/>  | <input type="checkbox"/> | <input type="checkbox"/> | <input type="checkbox"/> |
| 23. I find it easy to interpret the visual signals e.g. the count per second number from the SENSEI <sup>®</sup> Control Unit to localise a sentinel lymph node | <input type="checkbox"/> | <input type="checkbox"/> | <input type="checkbox"/>  | <input type="checkbox"/> | <input type="checkbox"/> | <input type="checkbox"/> |
| 24. I understand why I need to change ranges when using the SENSEI <sup>®</sup> Tethered Probe                                                                  | <input type="checkbox"/> | <input type="checkbox"/> | <input type="checkbox"/>  | <input type="checkbox"/> | <input type="checkbox"/> | <input type="checkbox"/> |

Subject ID -
**EASE OF USE  
SURGEON 3/5**
**SURGERY**  
(Day 1)

**Usability function**

|                                                                                                      | Strongly                 |                          | Neither                  |                          | Strongly                 | Do not                   |
|------------------------------------------------------------------------------------------------------|--------------------------|--------------------------|--------------------------|--------------------------|--------------------------|--------------------------|
|                                                                                                      | Disagree                 | Disagree                 | Disagree                 | Agree                    | Agree                    | Know                     |
| 25. I know when the SENSEI <sup>®</sup> system goes into an over-range state and how to change range | <input type="checkbox"/> | <input type="checkbox"/> | <input type="checkbox"/> | <input type="checkbox"/> | <input type="checkbox"/> | <input type="checkbox"/> |
| 26. Using the SENSEI <sup>®</sup> Control Unit to connect to an external display is easy             | <input type="checkbox"/> | <input type="checkbox"/> | <input type="checkbox"/> | <input type="checkbox"/> | <input type="checkbox"/> | <input type="checkbox"/> |
| 27. I understand why I need to change the visual display from MAX to AVG                             | <input type="checkbox"/> | <input type="checkbox"/> | <input type="checkbox"/> | <input type="checkbox"/> | <input type="checkbox"/> | <input type="checkbox"/> |
| 28. Setting the displayed count rate to AVG is easy                                                  | <input type="checkbox"/> | <input type="checkbox"/> | <input type="checkbox"/> | <input type="checkbox"/> | <input type="checkbox"/> | <input type="checkbox"/> |
| 29. Using the SENSEI <sup>®</sup> Control Unit to take a AVG at 5s reading is easy                   | <input type="checkbox"/> | <input type="checkbox"/> | <input type="checkbox"/> | <input type="checkbox"/> | <input type="checkbox"/> | <input type="checkbox"/> |
| 30. Removing the SENSEI <sup>®</sup> Tethered Probe from the patient is easy                         | <input type="checkbox"/> | <input type="checkbox"/> | <input type="checkbox"/> | <input type="checkbox"/> | <input type="checkbox"/> | <input type="checkbox"/> |
| 31. I know what type of radiopharmaceutical is compatible with SENSEI <sup>®</sup>                   | <input type="checkbox"/> | <input type="checkbox"/> | <input type="checkbox"/> | <input type="checkbox"/> | <input type="checkbox"/> | <input type="checkbox"/> |

**Usability ergonomics**

|                                                                                                                                                | Strongly                 |                          | Neither                  |                          | Strongly                 | Do not                   |
|------------------------------------------------------------------------------------------------------------------------------------------------|--------------------------|--------------------------|--------------------------|--------------------------|--------------------------|--------------------------|
|                                                                                                                                                | Disagree                 | Disagree                 | Disagree                 | Agree                    | Agree                    | Know                     |
| 32. I am able to complete all of the scanning I want to with the SENSEI <sup>®</sup> system in a timely manner, without disrupting my workflow | <input type="checkbox"/> | <input type="checkbox"/> | <input type="checkbox"/> | <input type="checkbox"/> | <input type="checkbox"/> | <input type="checkbox"/> |
| 33. It is easy to use the SENSEI <sup>®</sup> Control Unit touchscreen                                                                         | <input type="checkbox"/> | <input type="checkbox"/> | <input type="checkbox"/> | <input type="checkbox"/> | <input type="checkbox"/> | <input type="checkbox"/> |
| 34. The buttons on the SENSEI <sup>®</sup> Control Unit are easy to use                                                                        | <input type="checkbox"/> | <input type="checkbox"/> | <input type="checkbox"/> | <input type="checkbox"/> | <input type="checkbox"/> | <input type="checkbox"/> |
| 35. The icons on the SENSEI <sup>®</sup> Control Unit touchscreen are easy to understand                                                       | <input type="checkbox"/> | <input type="checkbox"/> | <input type="checkbox"/> | <input type="checkbox"/> | <input type="checkbox"/> | <input type="checkbox"/> |
| 36. It is easy to see the SENSEI <sup>®</sup> Control Unit screen from my normal operating position                                            | <input type="checkbox"/> | <input type="checkbox"/> | <input type="checkbox"/> | <input type="checkbox"/> | <input type="checkbox"/> | <input type="checkbox"/> |
| 37. It is easy to hear the SENSEI <sup>®</sup> Control Unit screen from my normal operating position with other operating room sounds present  | <input type="checkbox"/> | <input type="checkbox"/> | <input type="checkbox"/> | <input type="checkbox"/> | <input type="checkbox"/> | <input type="checkbox"/> |

Subject ID -

**EASE OF USE  
SURGEON 4/5**

**SURGERY  
(Day 1)**

- |                                                                                                                  |                          |                          |                          |                          |                          |                          |
|------------------------------------------------------------------------------------------------------------------|--------------------------|--------------------------|--------------------------|--------------------------|--------------------------|--------------------------|
| 38. It is easy to control the volume level of the audio signal using the SENSEI® Control Unit                    | <input type="checkbox"/> | <input type="checkbox"/> | <input type="checkbox"/> | <input type="checkbox"/> | <input type="checkbox"/> | <input type="checkbox"/> |
| 39. Gripping onto the SENSEI® Tethered Probe is easy                                                             | <input type="checkbox"/> | <input type="checkbox"/> | <input type="checkbox"/> | <input type="checkbox"/> | <input type="checkbox"/> | <input type="checkbox"/> |
| 40. Manipulating the SENSEI® Tethered Probe to scan all areas I want to is easy                                  | <input type="checkbox"/> | <input type="checkbox"/> | <input type="checkbox"/> | <input type="checkbox"/> | <input type="checkbox"/> | <input type="checkbox"/> |
| 41. The SENSEI® Tethered Probe is suitable for use in patients of all sizes, e.g. a patient with a narrow pelvis | <input type="checkbox"/> | <input type="checkbox"/> | <input type="checkbox"/> | <input type="checkbox"/> | <input type="checkbox"/> | <input type="checkbox"/> |

42. Which of the following areas have you used the SENSEI® Tethered Probe to scan

Left-hand side of the patient

Right-hand side of the patient

Obturator LN package

Obturator LN package

Pre-sacral LN package

Internal Iliac LN package

Internal Iliac LN package

Common Iliac LN package

External Iliac LN package

External Iliac LN package

- |                                                                                                                    | <b>Strongly<br/>Disagree</b> | <b>Disagree</b>          | <b>Neither<br/>Agree or<br/>Disagree</b> | <b>Agree</b>             | <b>Strongly<br/>Agree</b> | <b>Do not<br/>Know</b>   |
|--------------------------------------------------------------------------------------------------------------------|------------------------------|--------------------------|------------------------------------------|--------------------------|---------------------------|--------------------------|
| 43. It is easy to find a location in the operating theatre for the SENSEI® Control Unit and SENSEI® Tethered Probe | <input type="checkbox"/>     | <input type="checkbox"/> | <input type="checkbox"/>                 | <input type="checkbox"/> | <input type="checkbox"/>  | <input type="checkbox"/> |
| 44. It is easy to find a location to store the SENSEI® system                                                      | <input type="checkbox"/>     | <input type="checkbox"/> | <input type="checkbox"/>                 | <input type="checkbox"/> | <input type="checkbox"/>  | <input type="checkbox"/> |

Subject ID -

**EASE OF USE  
SURGEON 5/5**

**SURGERY**  
*(Day 1)*

**Training/Supporting documentation**

|                                                                                                                       | Strongly                 |                          | Neither                  |                          | Strongly                 | Do not                   |
|-----------------------------------------------------------------------------------------------------------------------|--------------------------|--------------------------|--------------------------|--------------------------|--------------------------|--------------------------|
|                                                                                                                       | Disagree                 | Disagree                 | Disagree                 | Agree                    | Agree                    | Know                     |
| 45. The training I received on the SENSEI <sup>®</sup> system was useful                                              | <input type="checkbox"/> | <input type="checkbox"/> | <input type="checkbox"/> | <input type="checkbox"/> | <input type="checkbox"/> | <input type="checkbox"/> |
| 46. I refer to the instructions for use to find additional information when I need to                                 | <input type="checkbox"/> | <input type="checkbox"/> | <input type="checkbox"/> | <input type="checkbox"/> | <input type="checkbox"/> | <input type="checkbox"/> |
| 47. I refer to the packaging paper insert to find additional information when I need to                               | <input type="checkbox"/> | <input type="checkbox"/> | <input type="checkbox"/> | <input type="checkbox"/> | <input type="checkbox"/> | <input type="checkbox"/> |
| 48. I refer to the training video to find additional information when I need to                                       | <input type="checkbox"/> | <input type="checkbox"/> | <input type="checkbox"/> | <input type="checkbox"/> | <input type="checkbox"/> | <input type="checkbox"/> |
| 49. Roughly how many patients did you think it needed for you to become confident using the device?<br>_____ patients |                          |                          |                          |                          |                          |                          |
